# Supplementary material for: Gold-plasmon enhanced solar-to-hydrogen conversion on the {001} facets of anatase TiO2 nanosheets
Source: Royal Society of Chemistry journal article supplement (doi:10.1039/c3ee43289k), 2013-11-15
Supplement: c3ee43289k.pdf [file c3ee43289k.pdf]

# Gold-plasmon enhanced solar-to-hydrogen conversion on the {001} facets of anatase TiO<sub>2</sub> nanosheets

Jinlin Long<sup>a,c,†,\*</sup>, Hongjin Chang<sup>b,†</sup>, Quan Gu<sup>a,c</sup>, Jie Xu<sup>a</sup>, Lizhou Fan<sup>a</sup>, Shuchao Wang<sup>c</sup>, Yangen Zhou<sup>a</sup>, Wei Wei<sup>c</sup>, Ling Huang<sup>b,c,\*</sup>, Xuxu Wang<sup>a</sup>, Ping Liu<sup>a</sup>, Wei Huang<sup>b,c,\*</sup>

<sup>a</sup>Research Institute of Photocatalysis, Fujian Provincial Key Laboratory of Photocatalysis--State Key Laboratory Breeding Base, Fuzhou University, Fuzhou 350002, China

E-mail: [jllong@fzu.edu.cn](mailto:jllong@fzu.edu.cn)

Personal URL: <http://chem.fzu.edu.cn/szdw/teacherinfo.aspx?id=40>

Tel: +86-591-83779121; fax: +86-591-83779121

<sup>b</sup>Institute of Advanced Materials, NanjingTech University, Nanjing 210009, China.

E-mail: [iamlhuang@njut.edu.cn](mailto:iamlhuang@njut.edu.cn)

<sup>c</sup>School of Chemical and Biomedical Engineering, Nanyang Technological University, 637457, Singapore

E-mail: [lhuang@ntu.edu.sg](mailto:lhuang@ntu.edu.sg)

Tel: +65 63168825

## EXPERIMENTAL

**Catalyst preparation.** The synthesis of anatase TiO<sub>2</sub> nanosheets with dominated {001} facets was performed by a solvothermal method reported in literature<sup>1</sup>. In a typical experimental procedure, 25 mL of Ti(OBu)<sub>4</sub> and 3.525 mL of hydrofluoric acid solution (40 wt%) were mixed in a 100 mL beaker by magnetic stirring for 1 h, and then transferred into a dried Teflon-liner stainless steel autoclave with a volume of 100 mL. The autoclave was kept at 180 °C for 24 h in an electric oven. After reaction and being cooled to room temperature, the white powder was harvested by high-speed centrifugation and washed with ethanol and distilled water for several times. The resulting solid was checked by XRD and TEM to be anatase TiO<sub>2</sub> single-crystal nanosheets.

The Au/anatase TiO<sub>2</sub> nanosheet photocatalysts were synthesized by a simple oleylamine (OLA) reduction method. 1.0 g of as-prepared anatase TiO<sub>2</sub> nanosheets were firstly dispersed in 50 mL of distilled water, and then mixed with 1.0 mL of OLA and 10 mg/mL of HAuCl<sub>4</sub> aqueous solution by magnetic stirring for 2 h at 50 °C. The suspension was finally filtered and dried at 70-100 °C overnight. The as-synthesized solid samples were denoted as Au/TiO<sub>2</sub>-x (x represents Au loading). The Au loading is inductively coupled plasma optical emission spectroscopy (ICP-OES).

**Catalyst Characterization.** XRD measurements were performed on a Bruker D8 Advance X-ray diffractometer using Cu K $\alpha_1$  radiation ( $\lambda = 1.5406 \text{ \AA}$ ). The accelerating voltage and the applied current were 40 kV and 40 mA, respectively. HRTEM images were obtained by a JEOL model JEM 2010 EX instrument at an accelerating voltage of 200 kV. EPR spectra were recorded by a Bruker A-300-EPR X-band spectrometer. Photocurrent was measured using the conventional three-electrode electrochemical cell with a working electrode, a platinum foil counter electrode and a saturated calomel electrode (SCE) as reference electrode. The working electrode was immersed in a sodium sulfate electrolyte solution (0.2 M) and irradiated with different lights. The light/dark short circuit photocurrent response was recorded with a BAS Epsilon workstation.

**Electrochemical characterization.** The Au/TiO<sub>2</sub> particulate film electrodes were prepared by

applying 50  $\mu\text{L}$  of Au/TiO<sub>2</sub> slurry to the surface of an optically transparent electrode and covering approximately 0.25 cm<sup>2</sup>. The Au/TiO<sub>2</sub> slurry was prepared by mixing 0.1 g Au/TiO<sub>2</sub> powder and 1 g ethanol. The electrode was then dried on a warm plate. Electrochemical measurements were conducted with a BAS Epsilon Electrochemical System in a conventional three electrode cell, using a Pt plate as the counter electrode and Ag/AgCl electrode (3 M KCl) as the reference electrode. The working electrode was prepared by spreading the slurries over 0.25 cm<sup>2</sup> of indium tin oxide (ITO) glass substrate. Then the film was dried in air. The electrochemical measurement was carried out in a Na<sub>2</sub>SO<sub>4</sub> (0.2 M) electrolyte, which was purged with nitrogen gas for 2 h prior to the measurements. A 500 W xenon lamp (Beijin Changtuo, CHF-XM500) fitted with a (420 nm) cut-off filter and several bypass filters was used as the light source. All electrochemical potentials are reported vs. NHE.

**Photocatalytic Activity Testing.** The photocatalytic activities for hydrogen evolution under visible light irradiation were performed in a closed gas-recirculation system equipped with a top-irradiation Pyrex reaction vessel. 0.1 g of the catalyst was suspended in 80 ml of water containing 0.5 g of ethylenediaminetetraacetic acid disodium salt (EDTA) by a magnetic stirrer in Pyrex reaction vessel. The above suspension was evacuated 30 min to remove air prior to irradiation under a 300 W xenon lamp with a cut-off filter ( $\lambda \geq 420$  nm). The evolved hydrogen gas was circulated with a gas pump and quantified by gas chromatography (Shimadzu GC-8A, TCD, Ar carrier).

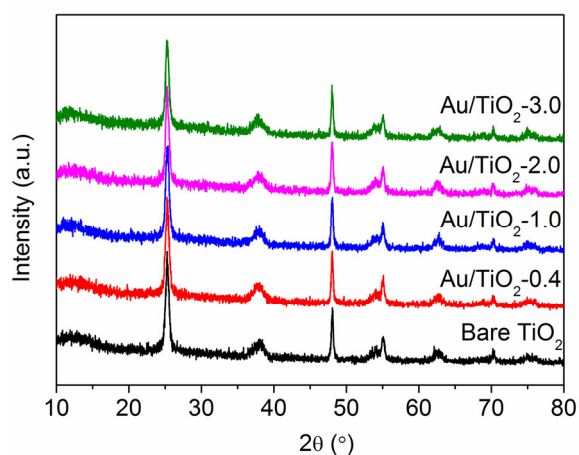

**Fig. S1** XRD patterns of bare TiO<sub>2</sub> and Au/TiO<sub>2</sub>-x (x denoted as percentage content of gold).

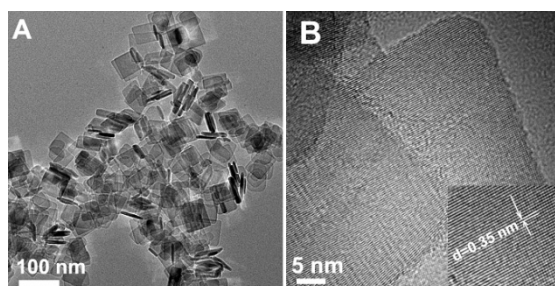

**Fig. S2** TEM (A) and HRTEM (B) images of the as-synthesized anatase TiO<sub>2</sub> nanosheets.

TEM analysis in Fig. S2A indicates the synthesized anatase TiO<sub>2</sub> possess well-defined sheet-shaped structures with rectangular outline, a side length of 50-80 nm, and a thickness of 5-8 nm. HRTEM image in Fig. S2B shows the established interplanar space of about 0.35 nm, agrees with the  $d_{101}$  spacing in the XRD pattern (Fig. S1). According to the symmetry of anatase TiO<sub>2</sub><sup>1-3</sup>, the top and bottom planes of the nanosheets are corresponding to the {001} facets. Based on the TEM results, the percentage of exposed {001} facets on the TiO<sub>2</sub> nanosheets is ca. 75%, in consistence with literature<sup>1</sup>.

(1) Han, X.; Kuang, Q.; Jin, M.; Xie, Z.; Zheng, L. *J. Am. Chem. Soc.* **2009**, *131*, 3152-3153.

(2) Pan, J.; Liu, G.; Lu, G. Q.; Cheng, H.-M. *Angew. Chem. Int. Ed.* **2011**, *50*, 2133-2137.

(3) Yang, H. G.; Sun, C. H.; Qiao, S. Z.; Zou, J.; Liu, G.; Smith, S. C.; Cheng, H. M.; Lu, G. Q. *Nature*, **2008**, *453*, 638-641.

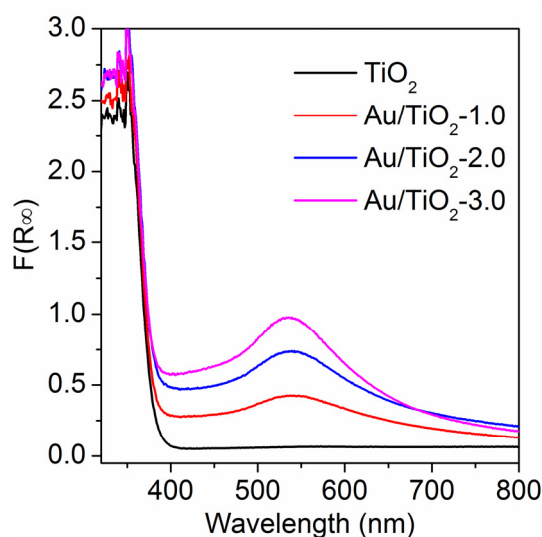

**Fig. S3** UV-Vis DRS spectra of gold-supported anatase TiO<sub>2</sub> nanosheets.

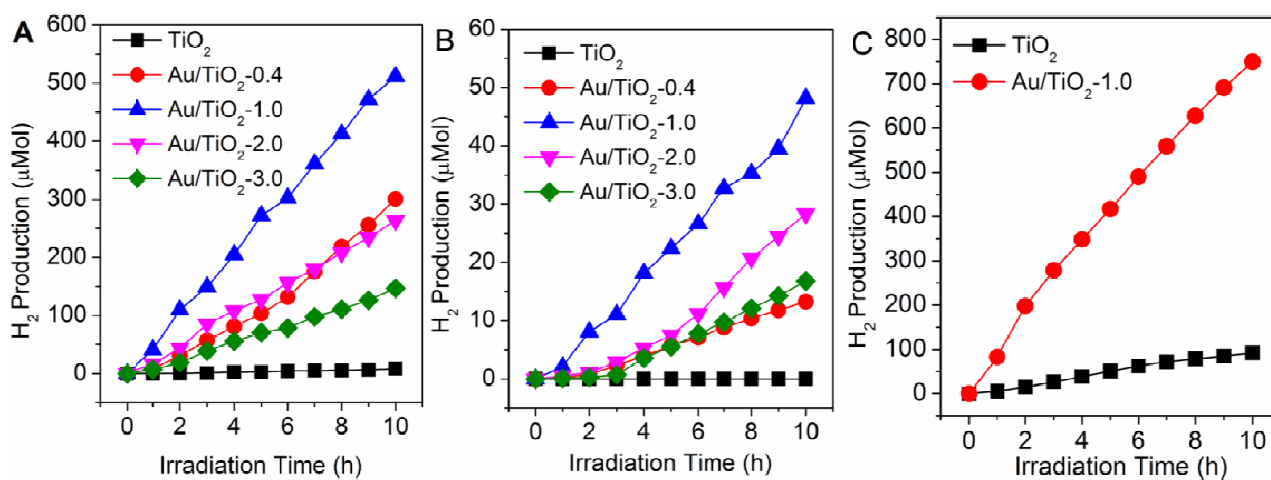

**Fig. S4** H<sub>2</sub> production of Au/TiO<sub>2</sub>-x (x= 0.4, 1.0, 2.0 and 3.0) as a function of irradiation time under solar light irradiation (A), >420 nm visible light irradiation (B), and 365 nm UV light irradiation (C).

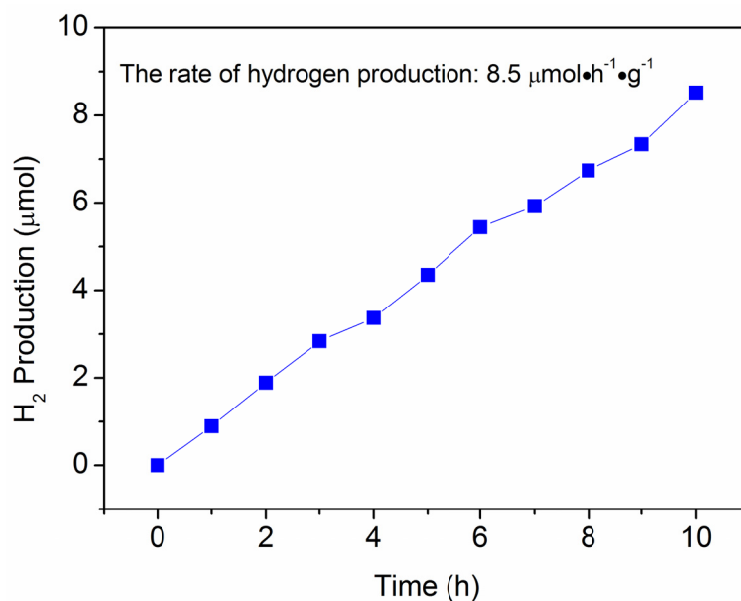

**Fig. S5** H<sub>2</sub> production of the reference photocatalyst, P25 TiO<sub>2</sub> with 1.0 wt% loading of Au NPs, as a function of irradiation time under > 420 nm visible light.

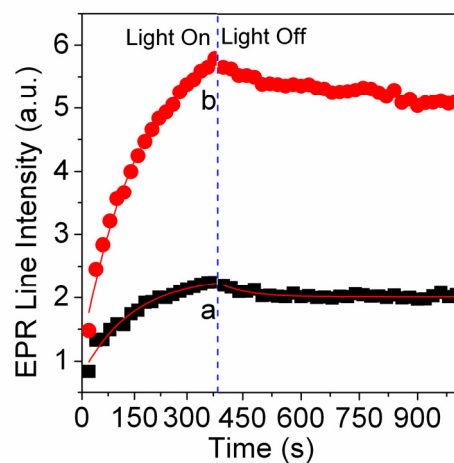

**Fig. S6** Intensity decay of the ESR line at  $g = 2.004$  (a) and  $1.989$  (b) as a function of irradiation time.
